# Supplementary material for: Whole Genomic Analysis of Human G1P[8] Rotavirus Strains From Different Age Groups in China
Source: PubMed Central journal article supplement (PMC3446763; doi:10.3390/v4081289), 2012-08-16
Supplement: viruses-04-01289-s001.pdf [file viruses-04-01289-s001.pdf]

**Supplementary Fig. S1.** Comparison of the deduced amino acid sequences of the VP7 genes of rotavirus strains Y128, R588 and E1911 with those of selected old and recent G1 rotavirus strains from China and other countries and the G1 component of rotavirus vaccines RotaTeq™ and Rotarix™. The variable regions (designated as V1 to V9) are shaded in grey. Variable regions V5, V7, V8, and V9 correspond to the putative antigenic regions A, B, C, and F, respectively.

Country/Strain/Year/G-P combination

|                         | 1        | V1             | V2              | V3             | 50          |
|-------------------------|----------|----------------|-----------------|----------------|-------------|
| CHN/Y128/2004/G1P[8]    | MYGIEYTT | ILIFLISIIILLNY | ILKSVTRIMDYIIYR | FLLISIALFALTKA |             |
| CHN/R588/2005/G1P[8]    | .....    | .....          | .....           | .....          | .....       |
| CHN/E1911/2009/G1P[8]   | .....    | .....          | M.....          | .....V.....    | .....       |
| USA/Wa/1974/G1P1A[8]    | .....    | .....          | .....           | .....TV.....   | .....R..... |
| JPN/K8/1977/G1P[9]      | .....    | .....          | .....           | .....T.....    | .....R..... |
| JPN/KU/1978/G1P1A[8]    | .....    | .....          | .....           | .....TV.....   | .....R..... |
| CHN/98'B43/1998/G1P[x]  | .....    | .....          | .....           | .....V.....    | .....       |
| CHN/Chi-78/2002/G1P[x]  | .....    | .....          | .....           | .....V.....    | .....       |
| BGD/Dhaka16/2003/G1P[8] | .....    | .....          | .....M.....     | .....FV.....   | .....       |
| THA/CMH022/2004/G1P[8]  | .....    | .....          | .....Q.....     | .....FV.....   | .....       |
| BEL/BE00006/2005/G1P[8] | .....    | .....          | .....           | .....FV.....   | .....       |
| CHN/Z678/2006/G1P[8]    | .....    | .....          | .....           | .....          | .....       |
| IND/61060/2006/G1P[8]   | .....    | .....          | .....           | .....FV.....   | .....       |
| KOR/CAU219/2006/G1P[8]  | .....    | .....          | .....           | .....V.....    | .....       |
| AUS/CK00047/2006/G1P[8] | .....    | .....          | .....           | .....          | .....       |
| USA/LB2719/2006/G1P[8]  | .....    | .....          | .....           | .....V.....    | .....       |
| CHN/AS4/2007/G1P[8]     | .....    | .....          | .....           | .....          | .....       |
| RotaTeq/G1              | .....    | .....          | .....           | .....TV.....   | .....R..... |
| Rotarix/G1              | .....    | .....          | .....           | S.....YV.....  | .....R..... |

|                         | 51             | V3           | V4                 | V5                       | 100   |
|-------------------------|----------------|--------------|--------------------|--------------------------|-------|
| CHN/Y128/2004/G1P[8]    | QNYGLNIPITGSMD | TVYSNSTQEGIF | FLTSTLCLYYP        | TEASNQISDGEWKD           |       |
| CHN/R588/2005/G1P[8]    | .....          | .....        | .....              | .....                    | ..... |
| CHN/E1911/2009/G1P[8]   | .....          | .....        | .....V.....        | .....                    | ..... |
| USA/Wa/1974/G1P1A[8]    | .....L.....    | A.....T..... | EV.....            | .....T.....N.....D.....  | ..... |
| JPN/K8/1977/G1P[9]      | .....L.....    | .....T.....  | EV.....            | N.....T.....N.....D..... | ..... |
| JPN/KU/1978/G1P1A[8]    | .....L.....    | .....T.....  | EV.....            | .....T.....N.....D.....  | ..... |
| CHN/98'B43/1998/G1P[x]  | .....          | .....        | .....V.....        | .....                    | ..... |
| CHN/Chi-78/2002/G1P[x]  | .....          | .....        | .....V.....        | .....                    | ..... |
| BGD/Dhaka16/2003/G1P[8] | .....          | .....        | .....R.....EV..... | .....T.....              | ..... |
| THA/CMH022/2004/G1P[8]  | .....          | .....        | .....V.....        | .....T.....              | ..... |
| BEL/BE00006/2005/G1P[8] | .....          | .....        | .....R.....EV..... | .....T.....              | ..... |
| CHN/Z678/2006/G1P[8]    | .....          | .....        | .....              | .....                    | ..... |
| IND/61060/2006/G1P[8]   | .....          | .....        | .....              | .....T.....              | ..... |
| KOR/CAU219/2006/G1P[8]  | .....M.....    | .....        | .....V.....        | .....                    | ..... |
| AUS/CK00047/2006/G1P[8] | .....          | .....        | .....E.....        | .....                    | ..... |
| USA/LB2719/2006/G1P[8]  | .....          | .....        | .....Y.....V.....  | .....T.....              | ..... |
| CHN/AS4/2007/G1P[8]     | .....          | .....        | .....              | .....                    | ..... |
| RotaTeq/G1              | .....L.....    | A.....T..... | EV.....            | .....T.....N.....D.....  | ..... |
| Rotarix/G1              | .....L.....    | .....A.....  | .....              | .....T.....N.....        | ..... |

|                         | 101                | V6           | V7          | 150               |
|-------------------------|--------------------|--------------|-------------|-------------------|
| CHN/Y128/2004/G1P[8]    | SLSQMFLTKGWPTGSVYF | KEYSNIVDFSVD | POLYCDYNLVL | LMKYDQNL          |
| CHN/R588/2005/G1P[8]    | .....              | .....        | .....       | .....             |
| CHN/E1911/2009/G1P[8]   | .....              | .....        | .....       | .....             |
| USA/Wa/1974/G1P1A[8]    | .....              | .....        | .....       | .....S.....       |
| JPN/K8/1977/G1P[9]      | .....              | .....S.....  | .....       | .....S.....       |
| JPN/KU/1978/G1P1A[8]    | .....              | .....S.....  | .....       | .....S.....V..... |
| CHN/98'B43/1998/G1P[x]  | .....              | .....        | .....       | .....             |
| CHN/Chi-78/2002/G1P[x]  | .....              | .....        | .....       | .....             |
| BGD/Dhaka16/2003/G1P[8] | .....              | .....        | .....       | .....             |
| THA/CMH022/2004/G1P[8]  | .....              | .....        | .....       | .....             |
| BEL/BE00006/2005/G1P[8] | .....              | .....        | .....       | .....             |
| CHN/Z678/2006/G1P[8]    | .....              | .....        | .....       | .....             |
| IND/61060/2006/G1P[8]   | .....              | .....        | .....       | .....             |
| KOR/CAU219/2006/G1P[8]  | .....              | .....        | .....       | .....             |
| AUS/CK00047/2006/G1P[8] | .....              | .....I.....  | .....       | .....             |
| USA/LB2719/2006/G1P[8]  | .....              | .....        | .....       | .....             |
| CHN/AS4/2007/G1P[8]     | .....              | .....        | .....       | .....             |
| RotaTeq/G1              | T.....             | .....S.....  | .....       | F.....S.....      |
| Rotarix/G1              | .....              | .....S.....  | .....       | .....             |

```

151
CHN/Y128/2004/G1P[8] DMSELADLILNEWLCNPMDDITLYYYQQSGESNKWISMGSSCTVKVCPLNT
CHN/R588/2005/G1P[8] .....
CHN/E1911/2009/G1P[8] .....
USA/Wa/1974/G1P1A[8] .....V.....
JPN/K8/1977/G1P[9] .....
JPN/KU/1978/G1P1A[8] .....
CHN/98'B43/1998/G1P[x] .....
CHN/Chi-78/2002/G1P[x] .....
BGD/Dhaka16/2003/G1P[8] .....
THA/CMH022/2004/G1P[8] .....
BEL/BE00006/2005/G1P[8] .....
CHN/Z678/2006/G1P[8] .....
IND/61060/2006/G1P[8] .....
KOR/CAU219/2006/G1P[8] .....
AUS/CK00047/2006/G1P[8] .....
USA/LB2719/2006/G1P[8] .....
CHN/AS4/2007/G1P[8] .....
RotaTeq/G1 .....V.....
Rotarix/G1 .....

```

```

201          v8          v9          250
CHN/Y128/2004/G1P[8] QTLGIGCQTNNVDSFETVAENEKLAIVDVVDGINHKKINLTTTTCTIRNCK
CHN/R588/2005/G1P[8] .....
CHN/E1911/2009/G1P[8] .....
USA/Wa/1974/G1P1A[8] .....MI.....
JPN/K8/1977/G1P[9] .....M.....
JPN/KU/1978/G1P1A[8] .....M.....
CHN/98'B43/1998/G1P[x] .....
CHN/Chi-78/2002/G1P[x] .....
BGD/Dhaka16/2003/G1P[8] .....N.....
THA/CMH022/2004/G1P[8] .....
BEL/BE00006/2005/G1P[8] .....
CHN/Z678/2006/G1P[8] .....
IND/61060/2006/G1P[8] .....
KOR/CAU219/2006/G1P[8] .....
AUS/CK00047/2006/G1P[8] .....I.....
USA/LB2719/2006/G1P[8] .....
CHN/AS4/2007/G1P[8] .....MI.....
RotaTeq/G1 .....MI.....
Rotarix/G1 .M.....M.....

```

```

251          300
CHN/Y128/2004/G1P[8] KLGPRENVAVIQVGGSNILDITADPTTNPQIERMMRVNWKRWVQVFTYIV
CHN/R588/2005/G1P[8] .....
CHN/E1911/2009/G1P[8] .....
USA/Wa/1974/G1P1A[8] .....V.....T.....K.....
JPN/K8/1977/G1P[9] .....V.....T.....K.....
JPN/KU/1978/G1P1A[8] .....V.....T.....K.....
CHN/98'B43/1998/G1P[x] .....
CHN/Chi-78/2002/G1P[x] .....
BGD/Dhaka16/2003/G1P[8] .....A.....
THA/CMH022/2004/G1P[8] .....A.....
BEL/BE00006/2005/G1P[8] .....A.....
CHN/Z678/2006/G1P[8] .....
IND/61060/2006/G1P[8] .....A.....
KOR/CAU219/2006/G1P[8] .....
AUS/CK00047/2006/G1P[8] .....
USA/LB2719/2006/G1P[8] .....
CHN/AS4/2007/G1P[8] .....
RotaTeq/G1 .....V.....T.....K.....
Rotarix/G1 .....V.....T.....K.....

```

|                         | 301                      | 326    |
|-------------------------|--------------------------|--------|
| CHN/Y128/2004/G1P[8]    | DYINQIVQVMSKRSLNSAAFYYRV |        |
| CHN/R588/2005/G1P[8]    | .....                    |        |
| CHN/E1911/2009/G1P[8]   | .....                    |        |
| USA/Wa/1974/G1P1A[8]    | .....                    |        |
| JPN/K8/1977/G1P[9]      | .....                    |        |
| JPN/KU/1978/G1P1A[8]    | .....                    |        |
| CHN/98'B43/1998/G1P[x]  | .....                    |        |
| CHN/Chi-78/2002/G1P[x]  | .....                    |        |
| BGD/Dhaka16/2003/G1P[8] | .....                    |        |
| THA/CMH022/2004/G1P[8]  | .....                    |        |
| BEL/BE00006/2005/G1P[8] | .....                    |        |
| CHN/Z678/2006/G1P[8]    | .....                    |        |
| IND/61060/2006/G1P[8]   | .....                    |        |
| KOR/CAU219/2006/G1P[8]  | .....                    |        |
| AUS/CK00047/2006/G1P[8] | .....                    |        |
| USA/LB2719/2006/G1P[8]  | .....H.....I.....        |        |
| CHN/AS4/2007/G1P[8]     | .....                    |        |
| RotaTeq/G1              | .....                    | S..... |
| Rotarix/G1              | .....                    | .....  |

---
